# Supplementary material for: Identifying the Superior Reperfusion Technique in Liver Transplantation: A Network Meta-Analysis
Source: Hindawi journal article supplement (doi:10.1155/2019/9034263), 2019-09-18
Supplement: f1 [file 9034263.f1.pdf]

**Table S1. Example search strategy and process in MEDLINE.**

| <b># No.</b> | <b>Search</b>               | <b>Results</b> |
|--------------|-----------------------------|----------------|
| 1            | exp (liver) OR hepatic/     | 1115728        |
| 2            | exp (graft) OR allograft/   | 324001         |
| 3            | 1 AND 2                     | 32719          |
| 4            | exp transplantation/        | 704703         |
| 5            | 3 AND 4                     | 29789          |
| 6            | exp (flush) OR reperfusion/ | 99761          |
| 7            | prospective                 | 852082         |
| 8            | random                      | 331022         |
| 9            | randomized controlled trial | 601021         |
| 10           | 7 OR 8 OR 9                 | 1618262        |
| 11           | 5 AND 6 AND 10              | 252            |

**Table S2. Comparisons of included techniques in network meta-analysis regarding respective parameters. Odds ratios are presented in the cells in common between the column-defining and row-defining techniques.**

| Parameter          | Comparison [ OR (95%CI) ] |                         |                         |                         |                         |                    |
|--------------------|---------------------------|-------------------------|-------------------------|-------------------------|-------------------------|--------------------|
| Regarding DFR      | PV                        | 0.18 (0.02, 1.47)       | 0.06 (0.00, 1.14)       | 0.01 (0.00, 0.49)       |                         |                    |
|                    | 5.43 (0.68, 47.77)        | PV + HA (PV initialize) | 0.36 (0.06, 2.27)       | 0.08 (0.01, 1.26)       |                         |                    |
|                    | 15.71 (0.87, 251.94)      | 2.81 (0.44, 16.86)      | PV + HA (SR initialize) | 0.23 (0.03, 1.75)       |                         |                    |
|                    | 67.26 (2.02, 2082.22)     | 11.88 (0.79, 170.79)    | 4.37 (0.57, 33.36)      | RVC                     |                         |                    |
| Regarding ICU-stay | PV                        | -4.59 (-11.61, 2.19)    | -3.92 (-9.11, 1.05)     | -5.86 (-12.11, -0.06)   | -7.63 (-15.34, -0.33)   |                    |
|                    | 4.59 (-2.19, 11.61)       | PV + HA (HA initialize) | 0.61 (-4.26, 5.36)      | -1.30 (-7.29, 4.52)     | -3.09 (-10.36, 4.32)    |                    |
|                    | 3.92 (-1.05, 9.11)        | -0.61 (-5.36, 4.26)     | PV + HA (PV initialize) | -1.94 (-5.32, 1.42)     | -3.70 (-9.17, 2.10)     |                    |
|                    | 5.86 (0.06, 12.11)        | 1.30 (-4.52, 7.29)      | 1.94 (-1.42, 5.32)      | PV + HA (SR initialize) | -1.76 (-6.17, 2.98)     |                    |
|                    | 7.63 (0.33, 15.34)        | 3.09 (-4.32, 10.36)     | 3.70 (-2.10, 9.17)      | 1.76 (-2.98, 6.17)      | RVC                     |                    |
| Regarding BC       | HA                        | 1.80 (0.17, 21.74)      | 0.80 (0.01, 34.89)      | 0.60 (0.02, 15.41)      | 0.18 (0.00, 6.03)       | 1.02 (0.01, 58.44) |
|                    | 0.56 (0.05, 5.93)         | PV                      | 0.48 (0.02, 8.10)       | 0.35 (0.02, 2.71)       | 0.10 (0.01, 1.24)       | 0.56 (0.02, 15.38) |
|                    | 1.24 (0.03, 66.67)        | 2.10 (0.12, 52.36)      | PV + HA (HA initialize) | 0.62 (0.10, 5.69)       | 0.18 (0.02, 2.60)       | 0.96 (0.05, 36.97) |
|                    | 1.68 (0.06, 53.53)        | 2.88 (0.37, 41.98)      | 1.60 (0.18, 9.96)       | PV + HA (PV initialize) | 0.31 (0.08, 1.12)       | 1.72 (0.14, 23.60) |
|                    | 5.60 (0.17, 216.69)       | 9.81 (0.81, 181.37)     | 5.48 (0.38, 47.47)      | 3.24 (0.90, 12.72)      | PV + HA (SR initialize) | 5.90 (0.70, 54.93) |
|                    | 0.98 (0.02, 69.66)        | 1.78 (0.07, 58.04)      | 1.04 (0.03, 20.45)      | 0.58 (0.04, 7.32)       | 0.17 (0.02, 1.42)       | RVC                |
| Regarding GS       | HA                        | 0.53 (0.09, 2.97)       | 0.76 (0.05, 12.27)      | 2.10 (0.08, 77.60)      | 2.46 (0.05, 130.53)     |                    |
|                    | 1.88 (0.34, 10.99)        | PV                      | 1.41 (0.17, 13.85)      | 3.90 (0.25, 85.74)      | 4.41 (0.16, 179.20)     |                    |
|                    | 1.32 (0.08, 21.93)        | 0.71 (0.07, 5.98)       | PV + HA (PV initialize) | 2.76 (0.45, 23.82)      | 3.16 (0.23, 56.19)      |                    |
|                    | 0.48 (0.01, 13.09)        | 0.26 (0.01, 3.95)       | 0.36 (0.04, 2.20)       | PV + HA (SR initialize) | 1.17 (0.19, 7.13)       |                    |
|                    | 0.41 (0.01, 18.91)        | 0.23 (0.01, 6.10)       | 0.32 (0.02, 4.28)       | 0.86 (0.14, 5.34)       | RVC                     |                    |
| Regarding PS       | PV                        | 1.43 (0.25, 8.58)       | 2.67 (0.32, 26.23)      | 1.80 (0.11, 33.86)      |                         |                    |
|                    | 0.70 (0.12, 4.01)         | PV + HA (PV initialize) | 1.85 (0.54, 7.27)       | 1.36 (0.15, 12.13)      |                         |                    |
|                    | 0.38 (0.04, 3.15)         | 0.54 (0.14, 1.86)       | PV + HA (SR initialize) | 0.72 (0.10, 4.00)       |                         |                    |
|                    | 0.56 (0.03, 9.40)         | 0.74 (0.08, 6.88)       | 1.39 (0.25, 9.85)       | RVC                     |                         |                    |

**Table S3. Sensitivity analysis: quantitative comparisons of included techniques based on inconsistency models.**

| Parameter          | Comparison [ OR (95%CI) ] |                         |                         |                         |                         |                    |
|--------------------|---------------------------|-------------------------|-------------------------|-------------------------|-------------------------|--------------------|
|                    |                           |                         |                         |                         |                         |                    |
| Regarding DFR      | PV                        | 0.18 (0.02, 1.42)       | 0.07 (0.00, 0.92)       | 0.01 (0.00, 0.44)       |                         |                    |
|                    | 5.61 (0.71, 43.50)        | PV + HA (PV initialize) | 0.36 (0.05, 2.09)       | 0.09 (0.01, 1.25)       |                         |                    |
|                    | 15.29 (1.09, 257.18)      | 2.77 (0.48, 19.48)      | PV + HA (SR initialize) | 0.23 (0.03, 1.84)       |                         |                    |
|                    | 66.71 (2.28, 2295.39)     | 11.76 (0.80, 182.28)    | 4.26 (0.54, 33.52)      | RVC                     |                         |                    |
| Regarding ICU-stay | PV                        | -4.73 (-11.66, 2.05)    | -4.14 (-9.21, 1.19)     | -6.08 (-12.06, -0.03)   | -7.76 (-15.30, -0.01)   |                    |
|                    | 4.73 (-2.05, 11.66)       | PV + HA (HA initialize) | 0.65 (-4.03, 5.43)      | -1.36 (-6.86, 4.52)     | -3.02 (-10.10, 4.41)    |                    |
|                    | 4.14 (-1.19, 9.21)        | -0.65 (-5.43, 4.03)     | PV + HA (PV initialize) | -2.05 (-5.34, 1.23)     | -3.65 (-9.29, 2.18)     |                    |
|                    | 6.08 (0.03, 12.06)        | 1.36 (-4.52, 6.86)      | 2.05 (-1.23, 5.34)      | PV + HA (SR initialize) | -1.64 (-6.32, 3.11)     |                    |
|                    | 7.76 (0.01, 15.30)        | 3.02 (-4.41, 10.10)     | 3.65 (-2.18, 9.29)      | 1.64 (-3.11, 6.32)      | RVC                     |                    |
| Regarding BC       | HA                        | 1.51 (0.16, 24.02)      | 0.64 (0.01, 38.07)      | 0.48 (0.02, 15.70)      | 0.14 (0.00, 6.99)       | 0.76 (0.01, 70.66) |
|                    | 0.66 (0.04, 6.38)         | PV                      | 0.43 (0.02, 8.31)       | 0.32 (0.03, 2.86)       | 0.10 (0.01, 1.26)       | 0.52 (0.02, 15.73) |
|                    | 1.57 (0.03, 69.43)        | 2.33 (0.12, 64.04)      | PV + HA (HA initialize) | 0.76 (0.09, 5.87)       | 0.23 (0.02, 2.53)       | 1.25 (0.05, 37.75) |
|                    | 2.10 (0.06, 51.97)        | 3.10 (0.35, 37.52)      | 1.31 (0.17, 10.56)      | PV + HA (PV initialize) | 0.31 (0.08, 1.16)       | 1.63 (0.13, 24.44) |
|                    | 6.97 (0.14, 214.63)       | 10.48 (0.79, 165.04)    | 4.34 (0.40, 50.06)      | 3.27 (0.86, 12.92)      | PV + HA (SR initialize) | 5.34 (0.67, 58.77) |
|                    | 1.32 (0.01, 67.31)        | 1.91 (0.06, 61.07)      | 0.80 (0.03, 21.08)      | 0.61 (0.04, 7.52)       | 0.19 (0.02, 1.49)       | RVC                |
| Regarding GS       | HA                        | 0.52 (0.10, 3.19)       | 0.75 (0.05, 12.35)      | 2.17 (0.08, 72.45)      | 2.47 (0.05, 151.31)     |                    |
|                    | 1.92 (0.31, 10.39)        | PV                      | 1.41 (0.16, 13.60)      | 4.16 (0.24, 86.47)      | 4.78 (0.16, 188.15)     |                    |
|                    | 1.33 (0.08, 19.85)        | 0.71 (0.07, 6.06)       | PV + HA (PV initialize) | 2.84 (0.41, 24.37)      | 3.23 (0.25, 57.36)      |                    |
|                    | 0.46 (0.01, 12.31)        | 0.24 (0.01, 4.18)       | 0.35 (0.04, 2.42)       | PV + HA (SR initialize) | 1.16 (0.19, 7.38)       |                    |
|                    | 0.40 (0.01, 18.47)        | 0.21 (0.01, 6.29)       | 0.31 (0.02, 3.98)       | 0.86 (0.14, 5.28)       | RVC                     |                    |
| Regarding PS       | PV                        | 1.38 (0.24, 9.18)       | 2.70 (0.31, 28.04)      | 1.84 (0.11, 39.80)      |                         |                    |
|                    | 0.72 (0.11, 4.13)         | PV + HA (PV initialize) | 1.90 (0.50, 7.20)       | 1.31 (0.14, 13.50)      |                         |                    |
|                    | 0.37 (0.04, 3.19)         | 0.53 (0.14, 2.02)       | PV + HA (SR initialize) | 0.71 (0.11, 4.27)       |                         |                    |
|                    | 0.54 (0.03, 8.79)         | 0.76 (0.07, 7.39)       | 1.41 (0.23, 9.47)       | RVC                     |                         |                    |

**Table S4. Quality of the evidence from direct comparisons regarding respective parameters.**

| <b>Parameter</b>   | <b>Direct comparisons</b> |                         | <b>Quality of the evidence (GRADE)</b> |
|--------------------|---------------------------|-------------------------|----------------------------------------|
| Regarding DFR      | PV                        | PV + HA (PV initialize) | ⊕ (very low)                           |
|                    | PV + HA (PV initialize)   | PV + HA (SR initialize) | ⊕ ⊕ (low)                              |
|                    | PV + HA (SR initialize)   | RVC                     | ⊕ (very low)                           |
| Regarding ICU-stay | PV + HA (PV initialize)   | PV                      | ⊕ (very low)                           |
|                    |                           | PV + HA (HA initialize) | ⊕ (very low)                           |
|                    |                           | PV + HA (SR initialize) | ⊕ ⊕ (low)                              |
|                    | PV + HA (SR initialize)   | RVC                     | ⊕ (very low)                           |
| Regarding BC       | PV                        | HA                      | ⊕ (very low)                           |
|                    | PV + HA (PV initialize)   | PV                      | ⊕ (very low)                           |
|                    |                           | PV + HA (HA initialize) | ⊕ (very low)                           |
|                    |                           | PV + HA (SR initialize) | ⊕ ⊕ (low)                              |
|                    | PV + HA (SR initialize)   | RVC                     | ⊕ (very low)                           |
| Regarding GS       | PV                        | HA                      | ⊕ (very low)                           |
|                    | PV + HA (PV initialize)   | PV                      | ⊕ (very low)                           |
|                    |                           | PV + HA (SR initialize) | ⊕ ⊕ (low)                              |
|                    | PV + HA (SR initialize)   | RVC                     | ⊕ (very low)                           |
| Regarding PS       | PV + HA (PV initialize)   | PV                      | ⊕ (very low)                           |
|                    |                           | PV + HA (SR initialize) | ⊕ ⊕ (low)                              |
|                    | PV + HA (SR initialize)   | RVC                     | ⊕ (very low)                           |
